# Supplementary material for: Towards resolving poor performance of mechanistic soil organic carbon models
Source: Copernicus journal article supplement (doi:10.5194/egusphere-2025-2545), 2025-06-19
Supplement: Supplementary file 1 [file egusphere-2025-2545-supplement.pdf]

# Supplementary material of Towards resolving poor performance of mechanistic soil organic carbon models

Lingfei Wang<sup>1</sup>, Gab Abramowitz<sup>1</sup>, Ying-Ping Wang<sup>2</sup>, Andy Pitman<sup>1</sup>, Philippe Ciais<sup>3</sup> and Daniel S. Goll<sup>3</sup>

1 Climate Change Research Centre, University of New South Wales, Sydney, NSW 2052, Australia

2 CSIRO Environment, Clayton South, Melbourne, VIC 3169, Australia

3 Laboratoire des Sciences du Climat et de l'Environnement (LSCE), IPSL, CEA/CNRS/UVSQ, Université Paris-Saclay, Gif-sur-Yvette, France

## Soil moisture scalar

We introduce a soil moisture scalar  $K(\theta, \psi)$  to MIMICS,

$$K(\theta, \psi) = e^{\lambda\psi} \times \left( k_{a.min} + (1 - k_{a.min}) \times \left( \frac{\phi - \theta}{\phi} \right)^{0.5} \right) \times \left( \frac{\theta}{\phi} \right)^{0.5} \quad (E1)$$

where  $e^{\lambda\psi}$  describes the dependence of soil microbial activities on water potential, and  $\lambda$  (kPa<sup>-1</sup>) is the dependence of biological activity on soil matric potential  $\psi$  (kPa).  $\left( k_{a.min} + (1 - k_{a.min}) \times \left( \frac{\phi - \theta}{\phi} \right)^{0.5} \right)$  represents the effect of oxygen limitation on microbial activities, and the parameter  $k_{a.min}$  is the minimum relative SOC decomposition rate when the soil is fully saturated, and the oxygen supply rate is at its lowest.  $\left( \frac{\theta}{\phi} \right)^{0.5}$  represents the effect of diffusion limitation of substrates on SOC decomposition, and  $\theta$  is soil moisture content (mm mm<sup>-3</sup>) and  $\phi$  is soil porosity (mm mm<sup>-3</sup>). More details can be found at (Ghezzehei et al., 2019). We multiplied both  $V_{max}$  and microbial turnover rate ( $\tau$ ) by  $K(\theta, \psi)$  to represent the effects of soil moisture on microbial growth rates, which include both uptake and turnover (Wieder et al., 2019).

## Structure and equations of MES-C

MES-C has two litter pools, metabolic litter (LIT<sub>m</sub>) and structural litter (LIT<sub>s</sub>), and the decomposition of litter and SOC are governed by two functional types of microbes including  $r$ -selected (MIC<sub>r</sub>) and  $K$ -selected (MIC<sub>K</sub>) microbes. SOC is divided into three parts: light molecule weight carbon (LMWC), mineral associated organic carbon (MAOC) and aggregated organic carbon, where aggregated carbon includes three fractions: aggregated metabolic carbon (AGG<sub>m</sub>), aggregated structural carbon (AGG<sub>s</sub>) and aggregated mineral associated carbon

(AGG<sub>maoc</sub>). More description and assumptions can be found at Wieder et al., 2015 and Abramoff et al., 2022.

Decomposition of litter follows forward Michaelis-Menten kinetics, and microbial uptake of LMWC follows reversed Michaelis-Menten kinetics. Both kinetics are dependent on temperature sensitive maximum reaction velocities and half saturation constants calculated as,

$$V_{max} = e^{(V_{slope} \times T + V_{int})} \times a_v \times V_{mod} \quad (E2)$$

$$K_m = e^{(K_{slope} \times T + K_{int})} \times a_k \times K_{mod} \quad (E3)$$

The fluxes from donor to receiver pools are calculated as,

$$LIT_m - MIC_r = LIT_m \times V_{max[r1]} \times K(\theta, \psi) \times MIC_r / (K_{m[r1]} + MIC_r) \quad (E4)$$

$$LIT_s - MIC_r = LIT_s \times V_{max[r2]} \times K(\theta, \psi) \times MIC_r / (K_{m[r2]} + MIC_r) \quad (E5)$$

$$LMWC - MIC_r = MIC_r \times V_{max[r3]} \times K(\theta, \psi) \times LMWC / (K_{m[r3]} + LMWC) \quad (E6)$$

$$MIC_r - SOC = MIC_r \times \tau_r^2 \quad (E7)$$

$$LIT_m - MIC_k = LIT_m \times V_{max[k1]} \times K(\theta, \psi) \times MIC_k / (K_{m[k1]} + MIC_k) \quad (E8)$$

$$LIT_s - MIC_k = LIT_s \times V_{max[k2]} \times K(\theta, \psi) \times MIC_k / (K_{m[k2]} + MIC_k) \quad (E9)$$

$$LMWC - MIC_k = MIC_k \times V_{max[k3]} \times K(\theta, \psi) \times LMWC / (K_{m[k3]} + LMWC) \quad (E10)$$

$$MIC_k - SOC = MIC_k \times \tau_k^2 \quad (E11)$$

$$LMWC - MAOC = K(\theta, \phi) \times k_{adsorp} \times LMWC \times (1 - MAOC/Q_{max}) \quad (E12)$$

$$MAOC - LMWC = k_{desorp} \times MAOC/Q_{max} \quad (E13)$$

$$AGG_m - LIT_m = k_{ab} \times K(\theta, \phi) \times AGG_m \quad (E14)$$

$$AGG_s - LIT_s = k_{ab} \times K(\theta, \phi) \times AGG_s \quad (E15)$$

$$AGG_{maoc} - MAOC = k_{ab} \times K(\theta, \phi) \times AGG_{maoc} \quad (E16)$$

$$MAOC - AGG_{maoc} = k_{ma} \times K(\theta, \phi) \times MAOC \quad (E17)$$

$$LMWC - F_l = k_l \times K(\theta, \phi) \times LMWC \quad (E18)$$

Thus, changes in C pools can be described using the following equations,

$$\frac{dLIT_m}{dt} = I_m \times (1 - f_m) - E4 - E8 + E14 \quad (E19)$$

$$\frac{dLIT_s}{dt} = I_s \times (1 - f_s) - E5 - E9 + E15 \quad (E20)$$

$$\frac{dMIC_r}{dt} = (MGE[1] \times E4) + (MGE[2] \times E5) + (MGE[1] \times E6) - E7 \quad (E21)$$

$$\frac{dMIC_k}{dt} = (MGE[3] \times E8) + (MGE[4] \times E9) + (MGE[3] \times E10) - E11 \quad (E22)$$

$$\frac{dLMWC}{dt} = f_a[r] \times E7 + f_a[k] \times E11 + E13 - E6 - E10 - E12 - E18 \quad (E23)$$

$$\frac{dMAOC}{dt} = f_c[r] \times E7 + f_c[k] \times E11 + E16 + E12 - E13 - E17 \quad (E24)$$

$$\frac{dAGG_m}{dt} = I_m \times f_m - E14 \quad (E25)$$

$$\frac{dAGG_s}{dt} = I_s \times f_s - E15 \quad (E26)$$

$$\frac{dAGG_{maoc}}{dt} = E17 - E16 \quad (E27)$$

**Table S1** MES-C parameters, values and units used in this study

| Parameter           | Description                                      | Value                                                          | Units                                                                                | Reference                |
|---------------------|--------------------------------------------------|----------------------------------------------------------------|--------------------------------------------------------------------------------------|--------------------------|
| $V_{slope}$         | Regression coefficient (E2)                      | 0.063                                                          | $\ln(\text{mg } C_s (\text{mg MIC})^{-1} \text{ h}^{-1})$<br>$^{\circ}\text{C}^{-1}$ | (Wieder et al., 2015)    |
| $V_{int}$           | Regression intercept (E2)                        | 5.47                                                           | $\ln(\text{mg } C_s (\text{mg MIC})^{-1} \text{ h}^{-1})$                            | Same as above            |
| $a_v$               | Tuning coefficient (E2)                          | $8 \times 10^{-6}$                                             |                                                                                      | Same as above            |
| $V_{mod-r}$         | Modifies $V_{max}$ for fluxes into $MIC_r$ (E2)  | 10,2,10 <sup>a</sup>                                           |                                                                                      | Same as above            |
| $V_{mod-K}$         | Modifies $V_{max}$ for fluxes into $MIC_K$ (E2)  | 3,3,2 <sup>b</sup>                                             |                                                                                      | Same as above            |
| $K_{slope}$         | Regression coefficient (E3)                      | 0.017, 0.027, 0.017 <sup>a,b</sup>                             |                                                                                      | Same as above            |
| $K_{int}$           | Regression intercept (E3)                        | 3.19                                                           |                                                                                      | Same as above            |
| $a_k$               | Tuning coefficient (E3)                          | 10                                                             |                                                                                      | Same as above            |
| $K_{mod-r}$         | Modifies $K_m$ for fluxes into $MIC_r$ (E3)      | $0.125, 0.5, 0.25 \times P_{scalar}^a$                         |                                                                                      | Same as above            |
| $K_{mod-K}$         | Modifies $K_m$ for fluxes into $MIC_K$ (E3)      | $0.5, 0.25, 0.167 \times P_{scalar}^b$                         |                                                                                      | Same as above            |
| $P_{scalar}$        | Physical protection scalar used in $K_{mod}$     | $(2.0 \times e^{-2\sqrt{f_{clay}}})^{-1}$                      |                                                                                      | Same as above            |
| $\tau_r$            | r-selected microbial biomass turnover rate (E7)  | $5.2 \times 10^{-4} \times e^{0.3(f_{met})} \times \tau_{mod}$ | $\text{h}^{-1}$                                                                      | Same as above            |
| $\tau_k$            | K-selected microbial biomass turnover rate (E11) | $2.4 \times 10^{-4} \times e^{0.1(f_{met})} \times \tau_{mod}$ |                                                                                      | Same as above            |
| $\tau_{mod}$        | Modifies microbial turnover rate                 | $0.6 < \sqrt{NPP/100} < 1.3$                                   |                                                                                      | This study               |
| $f_{met}$           | Partitioning of litter inputs to $LIT_m$         | 0.85-0.013 (lignin/N)                                          |                                                                                      | (Wieder et al., 2015)    |
| $k_{adsorp}$        | Binding affinity of LMWC (E12)                   | $1/24.0 \times f_{pH}$                                         | $\text{h}^{-1}$                                                                      | (Abramoff et al., 2022)  |
| $f_{pH}$            | pH regulation on binding affinity                | $e^{-0.186 \times pH - 0.216}$                                 |                                                                                      | Same as above            |
| $Q_{max}$           | Maximum sorption capacity (E12)                  | $0.6 \times \%claysilt^c$                                      | $\text{mg C (g soil)}^{-1}$                                                          | (Georgiou et al., 2022)  |
| $K(\theta, \phi)^d$ | Moisture scalar (E12)                            | $(\theta/\phi)^{0.5}$                                          |                                                                                      | (Ghezzehei et al., 2019) |
| $k_{desorp}$        | Desorption rate (E13)                            | 1/6.0/24.0                                                     | $\text{h}^{-1}$                                                                      | (Wang et al., 2013)      |

|              |                                                                            |                                                            |               |                         |
|--------------|----------------------------------------------------------------------------|------------------------------------------------------------|---------------|-------------------------|
| $k_{ab}$     | Breakdown rate of soil aggregate carbon (E14)                              | $1.14 \times 10^{-5}$                                      | $h^{-1}$      | Same as above           |
| $k_{ma}$     | Rate of aggregate formation from MAOC (E17)                                | $4.57 \times 10^{-6}$                                      | $h^{-1}$      | Same as above           |
| $k_l$        | Leaching rate of LMWC                                                      | 0.0015/24                                                  | $h^{-1}$      | (Abramoff et al., 2022) |
| $f_m$        | Fraction of metabolic litter inputs transferred to AGG <sub>m</sub> (E18)  | 0.5                                                        |               | This study              |
| $f_s$        | Fraction of structural litter inputs transferred to AGG <sub>s</sub> (E19) | 0.5                                                        |               | This study              |
| MGE          | Microbial growth efficiency (E20)                                          | $0.55, 0.25, 0.75, 0.35 \times T_{scalar}^c$               | $mg\ mg^{-1}$ | (Wieder et al., 2015)   |
| $T_{scalar}$ | Temperature regulation on MGE                                              | $e^{(-0.015 \times f_T)}$                                  |               |                         |
| $f_a$        | Fraction of $\tau$ partitioned to LWMC (E22)                               | $1 - f_c$                                                  |               | (Wieder et al., 2015)   |
| $f_c$        | Fraction of $\tau$ partitioned to MAOC (E23)                               | $0.1 \times e^{-3(f_{met})}, 0.3 \times e^{-3(f_{met})^f}$ |               | Same as above           |

<sup>a</sup> For LIT<sub>m</sub>, LIT<sub>s</sub> and LMWC fluxes entering MIC<sub>r</sub>, respectively.

<sup>b</sup> For LIT<sub>m</sub>, LIT<sub>s</sub> and LMWC fluxes entering MIC<sub>K</sub>, respectively.

<sup>c</sup> %claysilt represents soil clay and silt content.

<sup>d</sup>  $\theta$  is soil moisture ( $mm^3\ mm^{-3}$ ) and  $\phi$  is soil porosity ( $mm^3\ mm^{-3}$ ).

<sup>e</sup> The first two values correspond to C fluxes into MIC<sub>r</sub>, the second two values correspond to C fluxes into MIC<sub>K</sub>.

<sup>f</sup> For MIC<sub>r</sub> and MIC<sub>K</sub>, respectively.

**Table S2** The optimised MIMICS parameters (dimensionless) and their value ranges

| Parameter | Definition                                                      | Range    |
|-----------|-----------------------------------------------------------------|----------|
| xav       | A scaling factor for $V_{max}$                                  | 0.1-10.0 |
| xak       | A scaling factor for $K_m$                                      | 0.5-20.0 |
| xdesorp   | A scaling factor for SOC desorption rate                        | 0.1-2.0  |
| xbeta     | An exponent of the biomass-dependent mortality rate of microbes | 1.0-2.0  |
| xdiff     | A scaling factor for SOC diffusion coefficient in soils         | 0.1-10.0 |
| xnpp      | A scaling factor for litter input represented by NPP            | 0.5-2.0  |

**Table S3** The optimised MES-C parameters (dimensionless) and their value ranges

| Parameter | Definition                                                             | Range    |
|-----------|------------------------------------------------------------------------|----------|
| xak       | A scaling factor for $K_m$                                             | 0.1-10.0 |
| xfm       | A scaling factor for metabolic litter inputs entering AGG <sub>m</sub> | 0.1-5.0  |
| xtvp      | A scaling factor for aggregated C breakdown rate                       | 0.1-10.0 |
| xtvc      | A scaling factor for aggregation formation rate from MAOC              | 0.1-10.0 |
| xqmax     | A scaling factor for maximum adsorption capacity                       | 0.5-5.0  |
| xnpp      | A scaling factor for litter input represented by NPP                   | 0.5-2.0  |

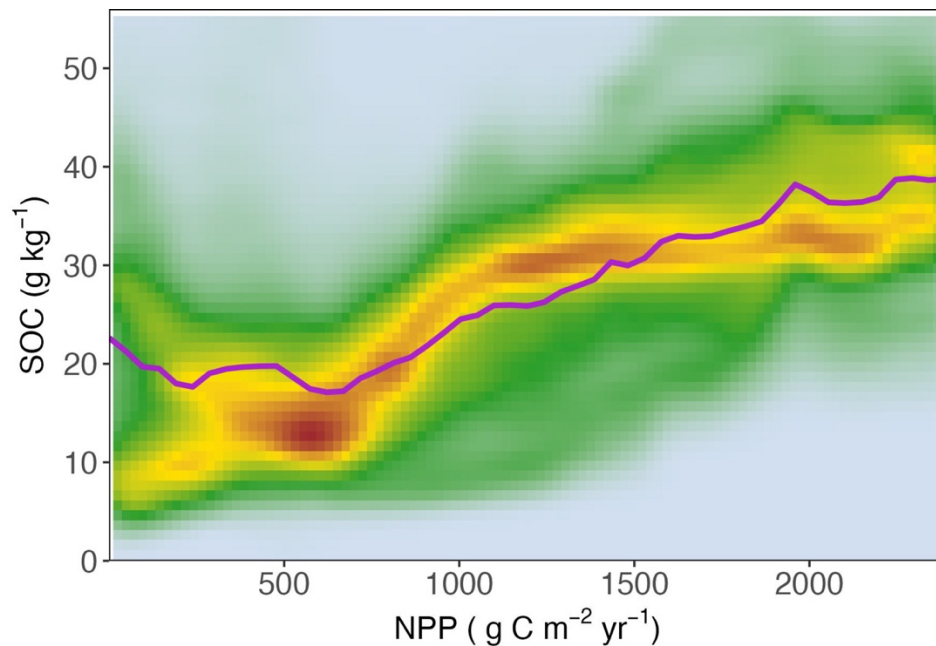

**Figure S1.** Density representation of ICE with respect to different predictors and observed SOC in natural ecosystems. The purple curves represent the mean partial dependence across all instances. Note that SOC greater than 56 g kg<sup>-1</sup> (around 1% of data) are not shown here.

## References

- Abramoff, R. Z., Guenet, B., Zhang, H., Georgiou, K., Xu, X., Rossel, R. A. V., Yuan, W. and Ciais, P. (2022). Improved global-scale predictions of soil carbon stocks with Millennial Version 2. *Soil Biology and Biochemistry* **164**: 108466.
- Georgiou, K., Jackson, R. B., Vinduřková, O., Abramoff, R. Z., Ahlström, A., Feng, W., Harden, J. W., Pellegrini, A. F., Polley, H. W. and Soong, J. L. (2022). Global stocks and capacity of mineral-associated soil organic carbon. *Nature Communications* **13**: 3797.
- Ghezzehei, T. A., Sulman, B., Arnold, C. L., Bogie, N. A. and Berhe, A. A. (2019). On the role of soil water retention characteristic on aerobic microbial respiration. *Biogeosciences* **16**: 1187-1209.
- Wang, G., Post, W. M. and Mayes, M. A. (2013). Development of microbial-enzyme-mediated decomposition model parameters through steady-state and dynamic analyses. *Ecological Applications* **23**: 255-272.
- Wieder, W., Grandy, A., Kallenbach, C., Taylor, P. and Bonan, G. (2015). Representing life in the Earth system with soil microbial functional traits in the MIMICS model. *Geoscientific Model Development* **8**: 1789-1808.
- Wieder, W. R., Sulman, B. N., Hartman, M. D., Koven, C. D. and Bradford, M. A. (2019). Arctic soil governs whether climate change drives global losses or gains in soil carbon. *Geophysical Research Letters* **46**: 14486-14495.
